# Supplementary material for: Corynoxine B targets at HMGB1/2 to enhance autophagy for α-synuclein clearance in fly and rodent models of Parkinson's disease
Source: PubMed Central journal article supplement — Acta Pharm Sin B. 2023 Mar 15;13(6):2701–14. doi: 10.1016/j.apsb.2023.03.011 (PMC10326294; doi:10.1016/j.apsb.2023.03.011), 2023-03-15
Supplement: mmc1.pdf [file mmc1.pdf]

**Supporting Information for**

**Original article**

**Corynoxine B targets at HMGB1/2 to enhance autophagy for alpha-synuclein clearance in fly and rodent models of Parkinson's disease**

**Qi Zhu<sup>a,†</sup>, Juxian Song<sup>b,c,†</sup>, Jiayue Chen<sup>a,†</sup>, Zhenwei Yuan<sup>c</sup>, Liangfeng Liu<sup>c,d,e</sup>, Liming Xie<sup>a</sup>, Qiwen Liao<sup>f</sup>, Richard D. Ye<sup>f</sup>, Xiu Chen<sup>a</sup>, Yepiao Yan<sup>a</sup>, Jieqiong Tan<sup>g</sup>, Chris Soon Heng Tan<sup>h</sup>, Min Li<sup>c,\*</sup>, Jiahong Lu<sup>a,\*</sup>**

<sup>a</sup>*State Key Laboratory of Quality Research in Chinese Medicine, Institute of Chinese Medical Sciences, University of Macau, Macao 999078, China*

<sup>b</sup>*Medical College of Acupuncture-Moxibustion and Rehabilitation, Guangzhou University of Chinese Medicine, Guangzhou 510006, China*

<sup>c</sup>*Mr. and Mrs. Ko Chi Ming Centre for Parkinson's Disease Research, School of Chinese Medicine, Hong Kong Baptist University, Hong Kong 999077, China*

<sup>d</sup>*Guangdong Corporate Key Laboratory of High-end Liquid Medicine R&D, Industrialization, Shaoguan 512028, China*

<sup>e</sup>*Limin Pharmaceutical Factory, Livzon Pharmaceutical Group Inc., Shaoguan 512028, China*

<sup>f</sup>*Kobilka Institute of Innovative Drug Discovery, School of Medicine, the Chinese University of Hong Kong, Shenzhen 518172, China*

<sup>g</sup>*Center for Medical Genetics, Life Science School, Central South University, Changsha 410031, China*

<sup>h</sup>*Department of Chemistry, College of Science, Southern University of Science and Technology, Shenzhen 518055, China*

Received 14 October 2022; received in revised form 12 February 2023; 28 February 2023

\*Corresponding authors.

E-mail addresses: [limin@hkbu.edu.hk](mailto:limin@hkbu.edu.hk) (Min Li); [jiahonglu@um.edu.mo](mailto:jiahonglu@um.edu.mo) (Jiahong Lu).

<sup>†</sup>These authors made equal contributions to this work.

**Running title:** Corynoxine B targets at HMGB1/2 to enhance autophagy in PD

## 1. Supporting tables

**Table S1** Reagents and antibodies

| Reagents                                                                 | Company name (Catalog number)          | City/State, Country     |
|--------------------------------------------------------------------------|----------------------------------------|-------------------------|
| Recombinant hHMGB1 protein                                               | Abcam (#ab167718)                      | Cambridge, UK           |
| Recombinant hHMGB2 protein                                               | Abcam (#ab109962)                      | Cambridge, UK           |
| Torin 1                                                                  | LC Laboratories (#T-7887)              | Massachusetts, US       |
| SAR405                                                                   | APExBIO (#A8883)                       | Houston, USA            |
| EBSS                                                                     | Gibco (#24010043)                      | Massachusetts, US       |
| Chloroquine                                                              | Sigma-Aldrich (#C6628)                 | Louis Missouri, US      |
| Kolliphor HS 15                                                          | Sigma-Aldrich (#42966)                 | Louis Missouri, US      |
| DMEM for SILAC                                                           | Thermo Scientific (#88364)             | Massachusetts, US       |
| <sup>13</sup> C <sub>6</sub> <sup>15</sup> N <sub>2</sub> L-Lysine-2HCl  | Thermo Scientific (#88209)             | Massachusetts, US       |
| L-Lysine-2HCl                                                            | Thermo Scientific (#88429)             | Massachusetts, US       |
| <sup>13</sup> C <sub>6</sub> <sup>15</sup> N <sub>4</sub> L-Arginine-HCl | Thermo Scientific (#89990)             | Massachusetts, US       |
| L-Arginine-HCl                                                           | Thermo Scientific (#89989)             | Massachusetts, US       |
| Dialyzed Fetal Bovine Serum                                              | Thermo Scientific (#26400044)          | Massachusetts, US       |
| RIPA lysis (Medium)                                                      | Beyotime (#P0013C)                     | Shanghai, CN            |
| RIPA lysis (Weak)                                                        | Beyotime (#P0013D)                     | Shanghai, CN            |
| Poly-D-lysine                                                            | Beyotime (#ST508)                      | Shanghai, CN            |
| Lipo8000                                                                 | Beyotime (#C0533)                      | Shanghai, CN            |
| Lipofectamine 3000                                                       | Invitrogen (#L30000015)                | California, US          |
| Anti-FLAG M2 Magnetic Beads                                              | Sigma-Aldrich (#M8823)                 | Louis Missouri, US      |
| Clean-Blot IP Detection Kit                                              | Thermo Scientific (#21232)             | Massachusetts, US       |
| DAB Substrate Kit                                                        | Vectorlabs (#SK-4100)                  | California, US          |
| Antibodies                                                               | Company name (Catalog number)          | City/State, Country     |
| Anti-phospho-AMPK $\alpha$ (Thr172)                                      | Cell Signaling Technology (#5256)      | Massachusetts, US       |
| Anti-AMPK                                                                | Cell Signaling Technology (#5831)      | Massachusetts, US       |
| Anti-Atg14                                                               | MBL(#PD026)                            | Hokkaido Prefecture, JP |
| Anti-PI 3-Kinase p100 (VPS34)                                            | Santa Cruz (#sc365404)                 | Texas, USA              |
| Anti-BECN1 (Beclin 1)                                                    | Santa Cruz (#sc11427)                  | Texas, USA              |
| Anti-HMGB1                                                               | Abcam (#ab18256)                       | Cambridge, UK           |
| Anti-HMGB2                                                               | Abcam (#ab124670)                      | Cambridge, UK           |
| Anti-SQSTM1                                                              | Abcam (#ab109012)                      | Cambridge, UK           |
| Anti-LC3                                                                 | Novus Biologicals (#NB100-2220)        | Colorado, US            |
| Anti-Tyrosine hydroxylase                                                | Pel-Freez (#P40101-0)                  | Arkansas, US            |
| Anti- $\beta$ -actin                                                     | Cell Signaling Technology (#4970)      | Massachusetts, US       |
| Anti- $\alpha$ -synuclein                                                | BD Transduction Laboratories (#610786) | California, US          |
| Purified anti- $\alpha$ -synuclein phospho-(Ser129) antibody             | BioLegend (#MMS-5091)                  | California, US          |
| Goat anti-mouse secondary antibody                                       | Cell Signaling Technology (#7076)      | Massachusetts, US       |
| Goat anti-rabbit secondary antibody                                      | Cell Signaling Technology (#7074)      | Massachusetts, US       |
| Goat anti-Rabbit Secondary Antibody, Alexa Fluor 555                     | Invitrogen (#A-21428)                  | California, US          |
| Goat anti-Mouse IgG Secondary Antibody, Alexa Fluor 488                  | Invitrogen (#A-11001)                  | California, US          |
| Goat anti-Rabbit Secondary Antibody, Alexa Fluor 488                     | Invitrogen (#A-11008)                  | California, US          |

## 2. Supporting figures

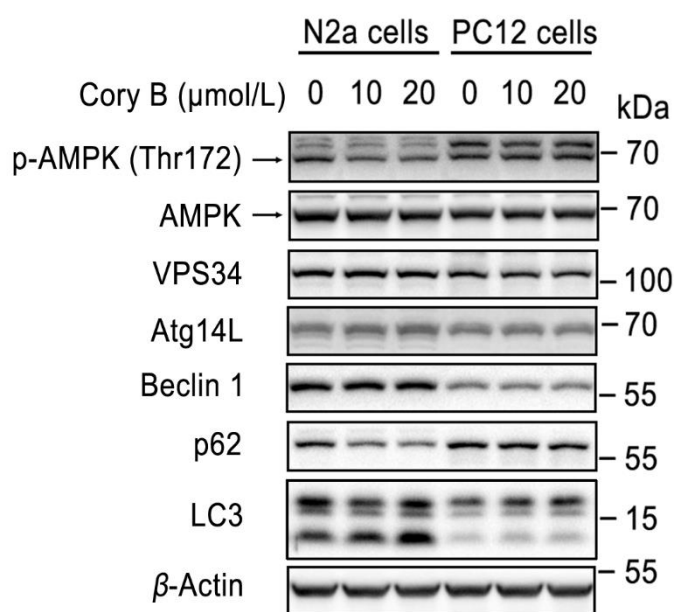

**Figure S1** Effects of corynoxine B (Cory B) on the expression levels of autophagy related proteins in N2a and PC12 cells. N2a cells and PC12 cells were treated with different concentrations of Cory B for 6 h. Expression levels of phospho-AMPK $\alpha$  (Thr172), total AMPK, VPS34, Atg14L, Beclin1, p62 and LC3 were analyzed by Western blot, and band intensities of phospho-AMPK $\alpha$  (Thr172) /total AMPK were used to compare AMPK activation.

We examined the effects of Cory B on autophagy after knocking down *Hmgb1*, *Hmgb2*, or both in N2a cells. Short interfering RNA (siRNA) for *Hmgb1* (siHMGB1) was synthesized based on previous study, and four different pairs of siRNAs for *Hmgb2* (siHMGB2) were synthesized and verified as Fig. S2A. siHMGB2-4 was chosen for further experiment. Results showed that transfection of siRNA for *Hmgb1* and *Hmgb2* individually decreased protein expression levels of HMGB1 and HMGB2, respectively. In addition, the dual knockdown of both *Hmgb1* and *Hmgb2* decreased their expression levels simultaneously (Fig. S2B). The loss of function resulting from individual knockdown of *Hmgb1* and *Hmgb2* markedly inhibited autophagy level in N2a cells, and dual knockdown synergistically enhanced the inhibitory effect (Fig. S2B–S2D).

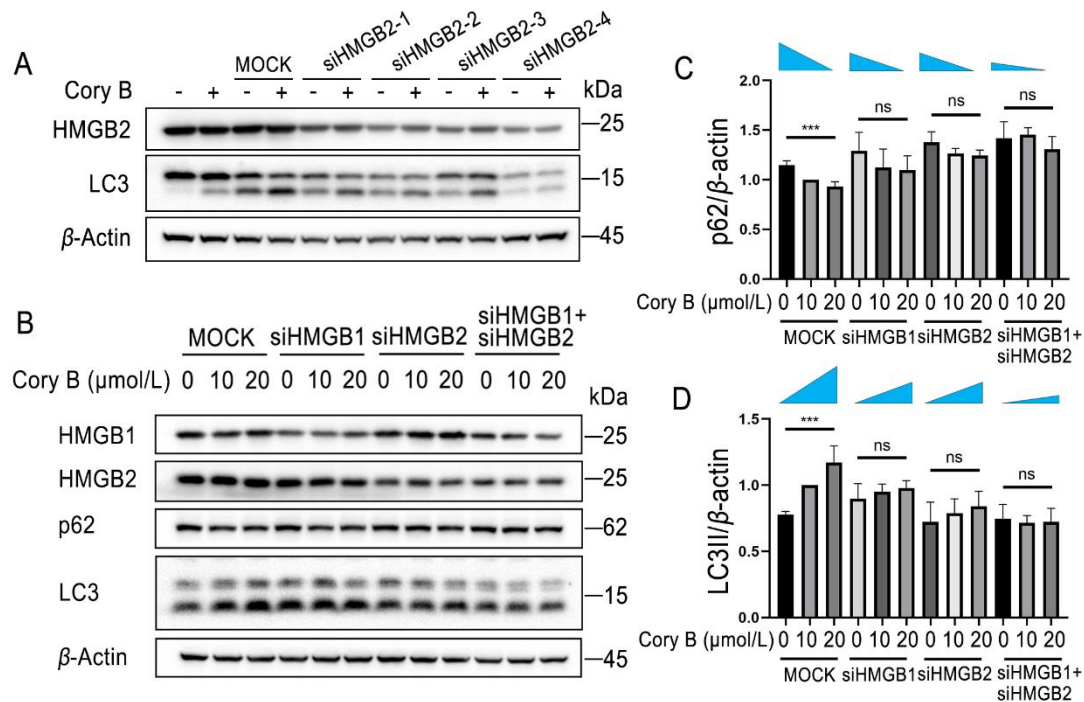

**Figure S2** Effects of corynoxine B (Cory B) on autophagy after knocking down *Hmgb1*, *Hmgb2*, or both in N2a cells by siRNA. *Hmgb1* knockout N2a cells were untreated or transfected with non-target and four different pairs of siRNAs for *Hmgb2*. After transfection for 48 h, 50  $\mu$ mol/L Cory B were added for another 12 h. Cell lysates were subjected to Western blot analysis. Expression levels of HMGB2 and LC3 were analyzed by Western blot. (B) N2a cells were transfected with non-target siRNA, *Hmgb1/2* specific siRNA or *Hmgb1&2* siRNAs for 48 h followed by indicated concentration of Cory B treatment for another 6 h. Cell lysates were subjected to Western blot analysis. (C, D) Normalized band intensities of p62/ $\beta$ -actin and LC3II/ $\beta$ -actin from three independent experiments were presented as mean  $\pm$  SD (\*\*\* $P$ <0.001; ns, no significance).

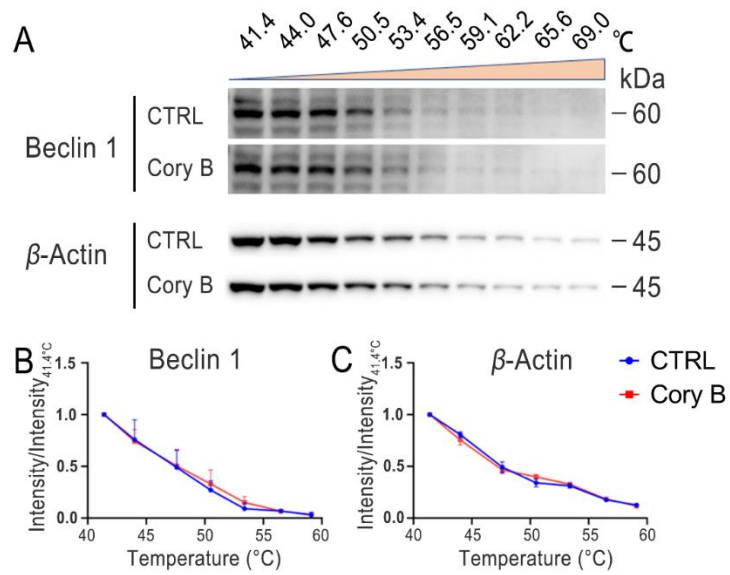

**Figure S3** The thermal stability of Beclin 1 did not change after 1 h of corynoxine B (Cory B) treatment. (A) Cellular thermal shift assay (CETSA) was performed in N2a cells. Cell lysates in control group and Cory B treatment group were subjected to Western blot analysis. (B, C) CETSA curves of Beclin 1 or  $\beta$ -actin in N2a cells were determined in the absence and presence of Cory B. Normalized band intensities ratio from three independent experiments are presented as mean  $\pm$  SD.

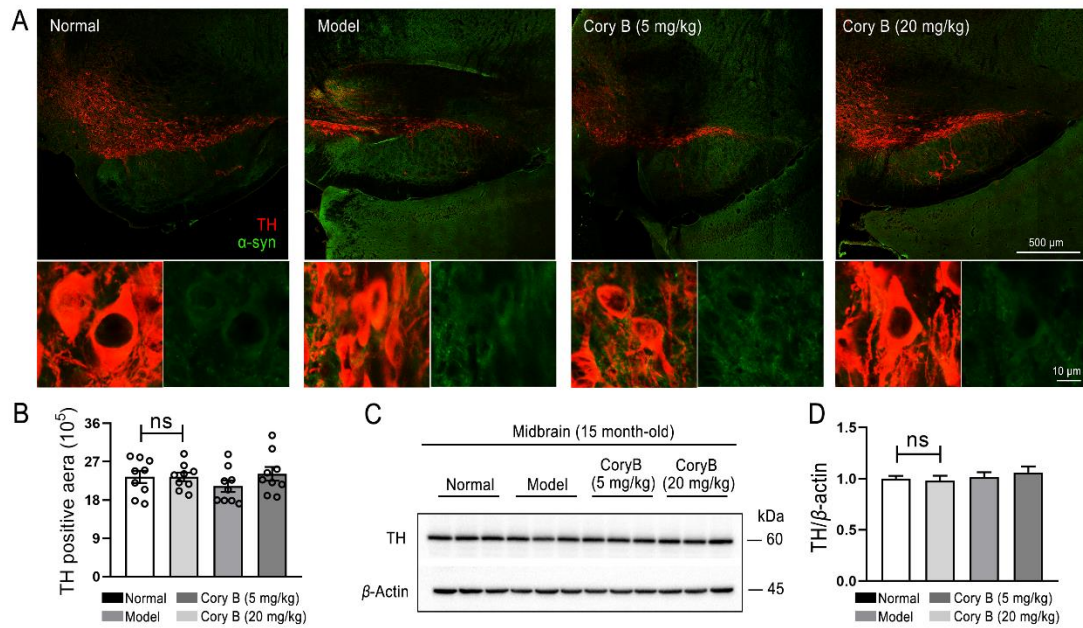

**Figure S4** No obvious dopaminergic neuron loss was observed in aged heterozygous A53T  $\alpha$ -syn transgenic mice. Corynoxine B (Cory B) reduced  $\alpha$ -synuclein ( $\alpha$ -syn) in tyrosine hydroxylase (TH) positive neurons. Representative images of TH expression in the midbrain assessed by immunofluorescence in 15-month-old PD transgenic mice. (B) Quantifications of TH in three ventral midbrain regions of 3 mice per group. (C, D) The midbrain of 15-month-old mice were sequentially extracted with Triton-X100 soluble and insoluble buffers, as described in Materials and Methods. The expression levels of TH in Triton-X100 soluble fraction were analyzed by Western blot.
